# Supplementary material
Source: HighWire-hosted journal article supplement (https://bmjopen.bmj.com/content/15/1/e085842)
Supplement: inline-supplementary-material-1 [file inline-supplementary-material-1.pdf]

**Table S1** STROBE Statement—Checklist of items that should be included in reports of cross-sectional studies

STROBE guidelines

| Section/topic        | Item number | Recommendation                                                                                                                                                                                                                                                                                                                                                                                                                                                                                                                                                                                                                                                     | Page No |
|----------------------|-------------|--------------------------------------------------------------------------------------------------------------------------------------------------------------------------------------------------------------------------------------------------------------------------------------------------------------------------------------------------------------------------------------------------------------------------------------------------------------------------------------------------------------------------------------------------------------------------------------------------------------------------------------------------------------------|---------|
| Title and abstract   | 1           | Indicate the study’s design with a commonly used term in the title or the abstract<br><br>Provide in the abstract an informative and balanced summary of what was done and what was found                                                                                                                                                                                                                                                                                                                                                                                                                                                                          | 2-4     |
| Introduction         |             |                                                                                                                                                                                                                                                                                                                                                                                                                                                                                                                                                                                                                                                                    |         |
| Background/rationale | 2           | Explain the scientific background and rationale for the investigation being reported                                                                                                                                                                                                                                                                                                                                                                                                                                                                                                                                                                               | 6       |
| Objectives           | 3           | State specific objectives, including any prespecified hypotheses                                                                                                                                                                                                                                                                                                                                                                                                                                                                                                                                                                                                   | 6-7     |
| Methods              |             |                                                                                                                                                                                                                                                                                                                                                                                                                                                                                                                                                                                                                                                                    |         |
| Study design         | 4           | Present key elements of study design early in the manuscript                                                                                                                                                                                                                                                                                                                                                                                                                                                                                                                                                                                                       | 7       |
| Setting              | 5           | Describe the setting, locations, and relevant dates, including periods of recruitment, exposure, follow-up, and data collection                                                                                                                                                                                                                                                                                                                                                                                                                                                                                                                                    | 7       |
| Participants         | 6           | Cohort study - give the eligibility criteria, and the sources and methods of selection of participants; describe methods of follow-up<br>Case-control study - give the eligibility criteria, and the sources and methods of case ascertainment and control selection; give the rationale for the choice of cases and controls<br><br>Cross-sectional study - give the eligibility criteria, and the sources and methods of selection of participants<br><br>Cohort study - for matched studies, give matching criteria and number of exposed and unexposed<br>Case-control study - for matched studies, give matching criteria and the number of controls per case | 7       |
| Variables            | 7           | Clearly define all outcomes, exposures, predictors, potential confounders, and effect modifiers; give diagnostic criteria, if                                                                                                                                                                                                                                                                                                                                                                                                                                                                                                                                      | 7-8     |

| STROBE guidelines            |             |                                                                                                                                                                                                                                                                                                                                                                                                                                                                                                                             |         |
|------------------------------|-------------|-----------------------------------------------------------------------------------------------------------------------------------------------------------------------------------------------------------------------------------------------------------------------------------------------------------------------------------------------------------------------------------------------------------------------------------------------------------------------------------------------------------------------------|---------|
| Section/topic                | Item number | Recommendation                                                                                                                                                                                                                                                                                                                                                                                                                                                                                                              | Page No |
|                              |             | applicable                                                                                                                                                                                                                                                                                                                                                                                                                                                                                                                  |         |
| Data sources/<br>measurement | 8*          | For each variable of interest, give sources of data and details of methods of assessment (measurement); describe comparability of assessment methods if there is more than one group                                                                                                                                                                                                                                                                                                                                        | 7-8     |
| Bias                         | 9           | Describe any efforts to address potential sources of bias                                                                                                                                                                                                                                                                                                                                                                                                                                                                   | -       |
| Study size                   | 10          | Explain how the study size was arrived at                                                                                                                                                                                                                                                                                                                                                                                                                                                                                   | 7       |
| Quantitative variables       | 11          | Explain how quantitative variables were handled in the analyses; if applicable, describe which groupings were chosen and why                                                                                                                                                                                                                                                                                                                                                                                                | 7       |
| Statistical methods          | 12          | Describe all statistical methods, including those used to control for confounding<br>Describe any methods used to examine subgroups and interactions<br>Explain how missing data were addressed<br>Cohort study - if applicable, explain how loss to follow-up was addressed<br>Case-control study - if applicable, explain how matching of cases and controls was addressed<br>Cross-sectional study - if applicable, describe analytical methods taking account of sampling strategy<br>Describe any sensitivity analyses | 8-10    |
| Results                      |             |                                                                                                                                                                                                                                                                                                                                                                                                                                                                                                                             |         |
| Participants                 | 13*         | Report numbers of individuals at each stage of study - e.g., numbers potentially eligible, examined for eligibility, confirmed eligible, included in the study, completing follow-up, and analyzed<br>Give reasons for nonparticipation at each stage Consider use of a flow diagram                                                                                                                                                                                                                                        | 10      |
| Descriptive data             | 14*         | Give characteristics of study participants (e.g., demographic, clinical, social) and information on exposures and potential confounders                                                                                                                                                                                                                                                                                                                                                                                     | 10      |

| STROBE guidelines |             |                                                                                                                                                                                                            |                |
|-------------------|-------------|------------------------------------------------------------------------------------------------------------------------------------------------------------------------------------------------------------|----------------|
| Section/topic     | Item number | Recommendation                                                                                                                                                                                             | Page No        |
| Outcome data      | 15*         | Indicate number of participants with missing data for each variable of interest                                                                                                                            | 11             |
|                   |             | Cohort study - summarize follow-up time (e.g., average and total amount)                                                                                                                                   |                |
|                   |             | Cohort study - report numbers of outcome events or summary measures over time                                                                                                                              |                |
| Main results      | 16          | Case-control study - report numbers in each exposure category, or summary measures of exposure                                                                                                             | 11-12          |
|                   |             | Cross-sectional study - report numbers of outcome events or summary measures                                                                                                                               |                |
|                   |             | Give unadjusted estimates and, if applicable, confounder-adjusted estimates and their precision (e.g., 95% confidence interval); make clear which confounders were adjusted for and why they were included |                |
| Other analyses    | 17          | Report category boundaries when continuous variables were categorized                                                                                                                                      | Not applicable |
| Discussion        | 18          | If relevant, consider translating estimates of relative risk into absolute risk for a meaningful time period                                                                                               |                |
|                   |             | Report other analyses done - e.g., analyses of subgroups and interactions, and sensitivity analyses                                                                                                        |                |
|                   |             |                                                                                                                                                                                                            |                |
| Key results       | 19          | Summarize key results with reference to study objectives                                                                                                                                                   | 12             |
| Limitations       | 20          | Discuss limitations of the study, taking into account sources of potential bias or imprecision; discuss both direction and magnitude of any potential bias                                                 | 14             |
| Interpretation    | 21          | Give a cautious overall interpretation of results considering objectives, limitations, multiplicity of analyses, results from similar studies, and other relevant evidence                                 | 12-14          |
| Generalizability  | 22          | Discuss the generalizability (external validity) of the study results                                                                                                                                      | 12-14          |
| Other information |             |                                                                                                                                                                                                            |                |
| Funding           | 22          | Give the source of funding and the role of                                                                                                                                                                 | 15             |

|                                                                                                                                                                        |             |                                                                                                                    |         |
|------------------------------------------------------------------------------------------------------------------------------------------------------------------------|-------------|--------------------------------------------------------------------------------------------------------------------|---------|
| STROBE guidelines                                                                                                                                                      |             |                                                                                                                    |         |
| Section/topic                                                                                                                                                          | Item number | Recommendation                                                                                                     | Page No |
|                                                                                                                                                                        |             | the funders for the present study and, if applicable, for the original study on which the present article is based |         |
| *Give information separately for cases and controls in case-control studies and, if applicable, for exposed and unexposed groups in cohort and cross-sectional studies |             |                                                                                                                    |         |

**Table S2** Scoring of different diseases in Charlson Comorbidity Index

| Scoring | Comorbidity                                                                                                                                                                                            |
|---------|--------------------------------------------------------------------------------------------------------------------------------------------------------------------------------------------------------|
| 1       | Ischemic heart disease; congestive heart failure; peripheral vascular disease; cerebrovascular disease; dementia; chronic pulmonary disease; mild liver disease; diabetes without chronic complication |
| 2       | Diabetes with chronic complication; renal impairment; tumor without metastasis                                                                                                                         |
| 3       | Moderate or severe liver disease                                                                                                                                                                       |
| 6       | Metastatic solid tumor; AIDS                                                                                                                                                                           |

Abbreviate: AIDS, Acquired Immune Deficiency Syndrome

**Table S3** Correlation coefficient of symptoms, functions, financial difficulties, characteristics and gQoL

|                        | Physical Function | Role Function | Emotional Function | Cognitive Function | Social Function | Fatigue | Nausea/vomiting | Pain   | Dyspnea | Insomina | Appetite | Constipation | Diarrhea | Financial difficulties | gQoL   | Age   | CCI   |
|------------------------|-------------------|---------------|--------------------|--------------------|-----------------|---------|-----------------|--------|---------|----------|----------|--------------|----------|------------------------|--------|-------|-------|
| Physical Function      | 1.000             |               |                    |                    |                 |         |                 |        |         |          |          |              |          |                        |        |       |       |
| Role Function          | 0.680             | 1.000         |                    |                    |                 |         |                 |        |         |          |          |              |          |                        |        |       |       |
| Emotional Function     | 0.282             | 0.324         | 1.000              |                    |                 |         |                 |        |         |          |          |              |          |                        |        |       |       |
| Cognitive Function     | 0.352             | 0.417         | 0.486              | 1.000              |                 |         |                 |        |         |          |          |              |          |                        |        |       |       |
| Social Function        | 0.491             | 0.564         | 0.380              | 0.429              | 1.000           |         |                 |        |         |          |          |              |          |                        |        |       |       |
| Fatigue                | -0.688            | -0.709        | -0.524             | -0.512             | -0.722          | 1.000   |                 |        |         |          |          |              |          |                        |        |       |       |
| Nausea vomiting        | -0.322            | -0.301        | -0.348             | -0.165             | -0.247          | 0.430   | 1.000           |        |         |          |          |              |          |                        |        |       |       |
| Pain                   | -0.488            | -0.536        | -0.368             | -0.368             | -0.469          | 0.607   | 0.343           | 1.000  |         |          |          |              |          |                        |        |       |       |
| Dyspnea                | -0.368            | -0.491        | -0.285             | -0.385             | -0.351          | 0.542   | 0.313           | 0.458  | 1.000   |          |          |              |          |                        |        |       |       |
| Insomina               | -0.254            | -0.282        | -0.381             | -0.408             | -0.298          | 0.462   | 0.260           | 0.406  | 0.336   | 1.000    |          |              |          |                        |        |       |       |
| Appetite               | -0.396            | -0.427        | -0.358             | -0.306             | -0.408          | 0.555   | 0.512           | 0.455  | 0.410   | 0.270    | 1.000    |              |          |                        |        |       |       |
| Constipation           | -0.287            | -0.324        | -0.252             | -0.165             | -0.213          | 0.347   | 0.351           | 0.357  | 0.308   | 0.254    | 0.415    | 1.000        |          |                        |        |       |       |
| Diarrhea               | -0.213            | -0.188        | -0.166             | -0.116             | -0.188          | 0.290   | 0.327           | 0.220  | 0.301   | 0.212    | 0.305    | 0.184        | 1.000    |                        |        |       |       |
| Financial difficulties | -0.310            | -0.340        | -0.230             | -0.285             | -0.467          | 0.434   | 0.277           | 0.308  | 0.304   | 0.140    | 0.273    | 0.214        | 0.285    | 1.000                  |        |       |       |
| gQoL                   | 0.329             | 0.469         | 0.331              | 0.364              | 0.397           | -0.513  | -0.265          | -0.407 | -0.404  | -0.302   | -0.379   | -0.283       | -0.213   | -0.336                 | 1.000  |       |       |
| Age                    | -0.230            | -0.138        | 0.007              | -0.015             | -0.120          | 0.129   | -0.016          | 0.022  | 0.052   | -0.053   | 0.062    | 0.045        | 0.014    | 0.026                  | -0.086 | 1.000 |       |
| CCI                    | -0.264            | -0.240        | -0.070             | -0.138             | -0.225          | 0.308   | 0.220           | 0.202  | 0.238   | 0.099    | 0.288    | 0.170        | 0.257    | 0.277                  | -0.277 | 0.123 | 1.000 |

Abbreviate: gQoL, Global health/quality of life; CCI, Charlson Comorbidity Index;

**Table S4** Descriptive statistics of the items

| Item content           | Expected influence | Predictability |
|------------------------|--------------------|----------------|
| Age                    | 0.048              | 0.965          |
| CCI                    | 0.382              | 0.901          |
| gQoL                   | 0.824              | 0.813          |
| Physical Function      | 0.724              | 0.665          |
| Role Function          | 1.052              | 0.625          |
| Emotional Function     | 0.739              | 0.801          |
| Cognitive Function     | 0.671              | 0.776          |
| Social Function        | 0.873              | 0.669          |
| Fatigue                | 1.617              | 0.450          |
| Nausea/vomiting        | 0.656              | 0.793          |
| Pain                   | 0.783              | 0.736          |
| Dyspnea                | 0.761              | 0.773          |
| Insomina               | 0.556              | 0.815          |
| Appetite loss          | 0.860              | 0.742          |
| Constipation           | 0.503              | 0.872          |
| Diarrhea               | 0.492              | 0.893          |
| Financial difficulties | 0.566              | 0.837          |

Abbreviate: CCI, Charlson Comorbidity Index; gQoL, Global health/quality of life

Table S5 Multiple linear analysis related to gQoL

|                        | Unstandardized        |       | Standardized | P-value      | F    | adj R <sup>2</sup> |
|------------------------|-----------------------|-------|--------------|--------------|------|--------------------|
|                        | β (95%CI)             | SE    | β            |              |      |                    |
|                        |                       |       |              | <0.001       | 22.4 | 0.329              |
| Role function          | 0.131(0.042-0.220)    | 0.045 | 0.161        | <b>0.004</b> |      |                    |
| Emotional function     | 0.068(-0.031-0.167)   | 0.050 | 0.064        | 0.177        |      |                    |
| Cognitive function     | 0.070(-0.023-0.164)   | 0.048 | 0.070        | 0.139        |      |                    |
| Fatigue                | -0.096(-0.224-0.033)  | 0.065 | -0.102       | 0.144        |      |                    |
| Pain                   | -0.046(-0.133-0.041)  | 0.044 | -0.053       | 0.296        |      |                    |
| Dyspnea                | -0.078(-0.159-0.002)  | 0.041 | -0.090       | 0.057        |      |                    |
| Insomnia               | -0.034(-0.091-0.022)  | 0.029 | -0.054       | 0.232        |      |                    |
| Appetite               | -0.049(-0.128-0.030)  | 0.040 | -0.059       | 0.223        |      |                    |
| Constipation           | -0.036(-0.104-0.032)  | 0.035 | -0.044       | 0.303        |      |                    |
| Financial difficulties | -0.076(-0.142--0.010) | 0.034 | -0.097       | <b>0.024</b> |      |                    |
| CCI                    | -0.988(-1.749--0.227) | 0.387 | -0.104       | <b>0.011</b> |      |                    |

Abbreviate: gQoL, Global health/quality of life; CCI, Charlson Comorbidity Index
